# Supplementary material for: Integrated genomics-based mapping reveals the genetics underlying maize flavonoid biosynthesis
Source: Springer Nature journal article supplement (doi:10.1186/s12870-017-0972-z), 2017-01-18
Supplement: MOESM10 [file 12870_2017_972_MOESM10_ESM.pdf]

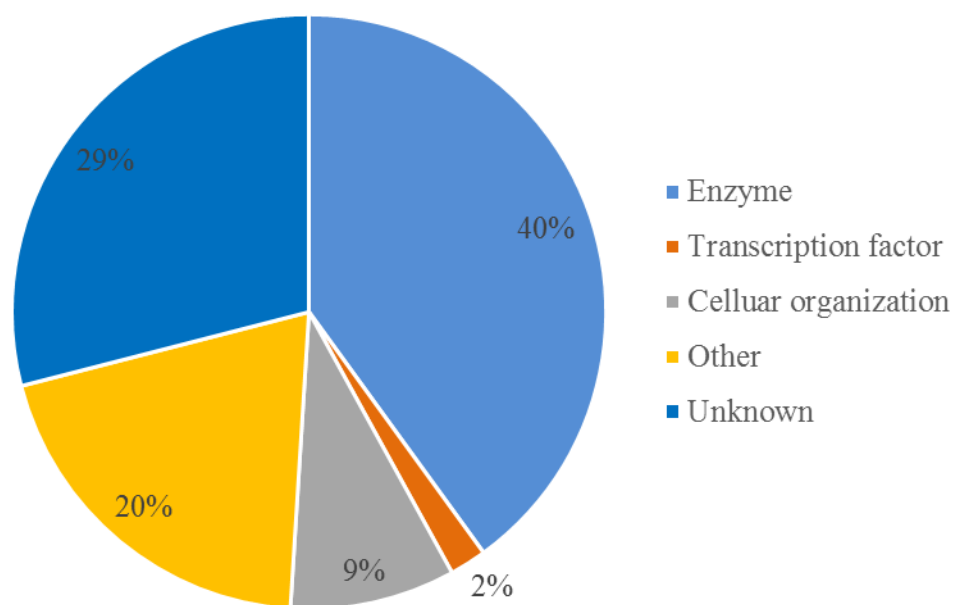

**Figure S3. Classification of candidate genes according to their functional annotations.**
